# Supplementary material for: Engineering Tocopherol Selectivity in α-TTP: A Combined In Vitro/In Silico Study
Source: PubMed Central journal article supplement (PMC3496730; doi:10.1371/journal.pone.0049195), 2012-11-13
Supplement: pone.0049195.s007.pdf [file pone.0049195.s007.pdf]

| H-bond                       | WT $\alpha$ -T | WT $\gamma$ -T | A156L $\alpha$ -T | A156L $\gamma$ -T |
|------------------------------|----------------|----------------|-------------------|-------------------|
| (Vit)-O ... HO-(Ser140)      | 2.17           | 2.05           | 1.79              | (4.89)            |
| (Vit)-OH ... OH <sub>2</sub> | 1.87           | 1.92           | 1.64              | 1.79              |
