# Supplementary material for: Engineering Tocopherol Selectivity in α-TTP: A Combined In Vitro/In Silico Study
Source: PubMed Central journal article supplement (PMC3496730; doi:10.1371/journal.pone.0049195), 2012-11-13

| Dihedral Angle | WT $\alpha$ -T | WT $\gamma$ -T | A156L $\alpha$ -T | A156L $\gamma$ -T |
|----------------|----------------|----------------|-------------------|-------------------|
| $\phi$ 1       | 176.62         | -169.54        | 166.72            | -179.43           |
| $\phi$ 2       | 49.70          | 55.04          | 159.63            | 45.56             |
| $\phi$ 3       | 177.20         | 175.46         | -78.27            | 172.90            |

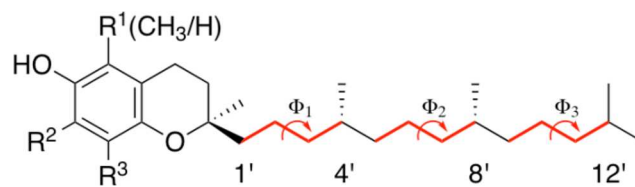

Supplement: pone.0049195.s008.pdf [file pone.0049195.s008.pdf]
