# Supplementary material for: Engineering Tocopherol Selectivity in α-TTP: A Combined In Vitro/In Silico Study
Source: PubMed Central journal article supplement (PMC3496730; doi:10.1371/journal.pone.0049195), 2012-11-13
Supplement: pone.0049195.s009.pdf [file pone.0049195.s009.pdf]

| Residue |          | WT $\alpha$ | WT $\gamma$ | A156L $\alpha$ | A156L $\gamma$ |
|---------|----------|-------------|-------------|----------------|----------------|
| Phe133  | $\chi_1$ | -107.63     | -173.56     | -151.56        | -147.30        |
|         | $\chi_2$ | 129.56      | -166.11     | -0.29          | -46.10         |
| Val182  | $\chi_1$ | -62.22      | -66.24      | -65.74         | -65.78         |
| Leu183  | $\chi_1$ | -52.67      | -94.31      | -68.02         | -150.29        |
|         | $\chi_2$ | -176.19     | 50.49       | -177.101       | 60.33          |
| Val206  | $\chi_1$ | -58.09      | -62.88      | 177.41         | 79.64          |
| Phe207  | $\chi_1$ | 179.37      | 171.37      | 177.50         | -172.55        |
|         | $\chi_2$ | -114.61     | -103.27     | 74.77          | 79.29          |
| Ile210  | $\chi_1$ | 71.78       | -167.53     | 170.46         | -53.01         |
|         | $\chi_2$ | 166.37      | 162.72      | 55.83          | 166.28         |
